# Supplementary material for: Validating the use of non-invasively sourced DNA for population genetic studies using pedigree data
Source: Copernicus journal article supplement (doi:10.5194/we-17-9-2017), 2017-03-09
Supplement: Supplementary file 1 [file we-17-9-2017-supplement.zip]

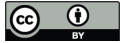

## *Supplement of*

# **Validating the use of non-invasively sourced DNA for population genetic studies using pedigree data**

**Faye Wedrowicz et al.**

*Correspondence to:* Faye Wedrowicz ([faye.wedrowicz@gmail.com](mailto:faye.wedrowicz@gmail.com))

- [we-17-9-2017-supplement-title-page.pdf](#)
- [WebEcology\\_GenotypicData.xlsx](#)
- [WebEcology\\_SupplementaryMaterial.pdf](#)

The copyright of individual parts of the supplement might differ from the CC-BY 3.0 licence.
