# Supplementary material for: Validating the use of non-invasively sourced DNA for population genetic studies using pedigree data
Source: Copernicus journal article supplement (doi:10.5194/we-17-9-2017), 2017-03-09
Supplement: Supplementary file 1 [file WebEcology_GenotypicData.xlsx]

## Sheet: Pedigree data
Individual	Dam	Sire	Gender
Runde	0	0	F
Merriki	Runde	0	F
Merv	Merriki	M1	M
Molly	Merriki	M2(K)	F
Emma	Merriki	Ganymede	F
Mitta	Molly	Vivian	M
Marlo	Molly	Banjo	M
Marlo	Molly	Banjo	M
Mantis	Molly	Ganymede	M
Mantis	Molly	Ganymede	M
Mac	Molly	Vivian	M
Marrguk	Molly	Ganymede	F
Lorien	0	0	F
Lindsay	Marrguk	0	M
Nellie	0	0	F
Kevin	0	0	M
Nugget	Natasha	0	F
Nemo	Nugget	Banjo	F
Nautilus	Nemo	Merv	M
Cassie	Bundy	M3(KJ)	F
Lisa	Cassie	Banjo	F
Lara	Lisa	Merv	F
Lennox	Lara	Vivian	M
Harriett	Bundy	M4(J)	F
Howqua	Harriett	Nautilus	F
Hara	Harriett	Merv	F
Han	Harriett	0	F
Jupiter	0	0	F
Ganymede	Jupiter	M5(KJ)	M
Callisto	Jupiter	M6(J)	F
Crimson	Callisto	Ganymede	F
Banjo	Maggie	M7(KJ)	M
Vivian	0	0	M
Bernie	0	0	F
Hawkins	0	0	M
Maggie	Matilda	Murumbeen	F
Natasha	Nellie	M8(K)	F
Bundy	Lilly	0	F
Lilly	Olga	0	F
Olga	0	0	F

## Sheet: Replicate data
Sample ID	K2.1	K2.1	K10.1	K10.1	Pcv2	Pcv2	Pcv6.1	Pcv6.1	Pcv6.3	Pcv6.3	Pcv24.2	Pcv24.2	Pcv25.2	Pcv25.2	Pcv30	Pcv30	Pcv31	Pcv31	Phc2	Phc2	Phc4	Phc4	Phc13	Phc13
MKA01	164	172	128	142	138	140	229	233	290	290	210	210	0	0	199	203	225	229	0	0	111	123	131	131
MKA01	164	172	128	142	138	140	229	233	290	290	206	210	0	0	199	203	225	229	0	0	111	123	127	131
MKA01	164	172	128	142	138	140	229	233	290	290	0	0	0	0	199	203	225	229	0	0	111	123	127	131
MKA01	164	172	128	142	138	140	229	233	290	290	210	210	0	0	199	203	225	229	0	0	111	123	127	131
MKA01_Cons	164	172	128	142	138	140	229	233	290	290	0	0	0	0	199	203	225	229	0	0	111	123	127	131
MKA02	0	0	128	142	0	0	233	233	290	290	210	212	0	0	203	203	225	225	0	0	0	0	0	0
MKA02	0	0	128	142	138	138	233	233	0	0	210	210	0	0	203	203	0	0	0	0	111	123	129	131
MKA02	0	0	142	142	0	0	233	233	0	0	210	212	0	0	0	0	0	0	0	0	111	111	0	0
MKA02	0	0	128	128	138	140	233	233	290	290	0	0	0	0	0	0	225	225	0	0	111	123	129	131
MKA02_Cons	0	0	128	142	0	0	233	233	0	0	210	212	0	0	0	0	0	0	0	0	111	123	129	131
MKA03B	166	172	128	142	138	140	233	233	290	290	210	212	0	0	203	203	225	229	0	0	111	123	129	131
MKA03B	166	172	128	142	138	140	233	233	290	290	210	212	0	0	203	203	225	229	0	0	111	123	129	131
MKA03B	166	172	128	142	138	140	233	233	290	290	210	212	0	0	203	203	225	229	0	0	111	123	129	131
MKA03B	166	172	128	142	138	138	233	233	290	290	210	212	0	0	203	203	225	229	0	0	111	123	129	131
MKA03B_Cons	166	172	128	142	138	140	233	233	290	290	210	212	0	0	203	203	225	229	0	0	111	123	129	131
WED074A	166	178	128	142	136	138	217	233	290	306	210	212	178	178	199	203	229	229	197	197	111	111	129	131
WED074A	166	178	128	142	136	138	217	233	290	306	210	212	178	178	199	203	229	229	197	197	111	111	129	131
WED074A	166	178	128	142	136	138	217	233	290	306	210	212	178	178	199	203	229	229	197	197	111	111	129	131
WED074A_Cons	166	178	128	142	136	138	217	233	290	306	210	212	178	178	199	203	229	229	197	197	111	111	129	131
MKA04	166	178	128	142	136	138	217	233	290	306	210	212	178	178	199	203	229	229	0	0	111	111	129	131
MKA04	166	178	128	142	136	138	217	233	290	306	210	212	178	178	199	203	229	229	0	0	111	111	129	131
MKA04	166	178	128	142	136	138	0	0	0	0	0	0	178	178	199	203	229	229	197	197	111	111	129	131
MKA04_Cons	166	178	128	142	136	138	217	233	290	306	210	212	178	178	199	203	229	229	0	0	111	111	129	131
MKA05	166	166	0	0	0	0	217	233	290	298	210	210	178	178	197	203	229	229	197	197	111	111	115	129
MKA05	0	0	132	132	138	140	217	233	0	0	210	210	178	178	0	0	229	229	0	0	111	111	115	129
MKA05	0	0	0	0	0	0	217	233	0	0	210	210	178	178	0	0	0	0	0	0	111	111	0	0
MKA05	0	0	0	0	140	140	217	233	290	298	210	210	0	0	0	0	0	0	0	0	111	111	115	129
MKA05_Cons	0	0	0	0	138	140	217	233	290	298	210	210	178	178	0	0	0	0	0	0	111	111	115	129
WED132A	166	180	132	142	138	140	217	233	290	306	210	210	170	178	197	203	229	229	197	197	111	111	115	131
WED132A	166	180	132	142	138	140	217	233	290	306	210	210	170	178	197	203	229	229	197	197	111	111	115	131
WED132A	0	0	132	142	138	140	217	233	290	306	210	210	170	178	197	203	229	229	197	197	111	111	115	131
WED132A	166	180	132	142	138	140	217	233	290	306	210	210	170	178	197	203	229	229	0	0	111	111	115	131
WED132A_Cons	166	180	132	142	138	140	217	233	290	306	210	210	170	178	197	203	229	229	197	197	111	111	115	131
MKA06	164	166	132	132	140	140	217	233	290	298	210	210	0	0	197	203	229	231	0	0	111	123	115	129
MKA06	164	166	132	132	140	140	217	233	290	298	210	210	0	0	197	203	229	231	0	0	111	123	115	129
MKA06	164	166	132	132	140	140	217	233	290	298	210	212	0	0	197	203	229	231	197	197	111	123	115	129
MKA06_Cons	164	166	132	132	140	140	217	233	290	298	210	210	0	0	197	203	229	231	0	0	111	123	115	129
WED129A	166	172	128	132	140	140	229	233	290	290	210	210	178	178	203	203	229	229	197	197	123	123	115	129
WED129A	166	172	128	132	140	140	229	233	290	290	210	210	178	178	203	203	229	229	197	197	123	123	115	129
WED129A	166	172	128	132	140	140	229	233	290	290	210	210	178	178	203	203	229	229	197	197	123	123	115	129
WED129A	166	172	128	132	140	140	229	233	290	290	210	210	178	178	203	203	229	229	197	197	123	123	115	129
MKA08	0	0	128	132	140	142	229	229	290	298	210	210	170	178	199	203	225	229	0	0	111	123	129	129
MKA08	0	0	128	132	140	142	229	229	290	298	210	210	170	178	199	203	225	229	0	0	111	123	129	129
MKA08	0	0	128	132	140	142	229	229	290	298	210	210	170	178	199	203	225	229	197	197	111	123	129	129
MKA08_Cons	0	0	128	132	140	142	229	229	290	298	210	210	170	178	199	203	225	229	0	0	111	123	129	129
MKA09	176	178	132	132	140	142	217	217	290	290	210	210	170	170	197	199	225	229	197	197	123	123	129	129
MKA09	176	178	132	132	140	142	217	217	290	290	210	210	170	170	197	199	225	229	197	197	123	123	129	129
MKA09	176	178	132	132	140	142	217	217	290	290	210	210	170	170	197	199	225	229	197	197	123	123	129	129
MKA09_Cons	176	178	132	132	140	142	217	217	290	290	210	210	170	170	197	199	225	229	197	197	123	123	129	129
MKA10	166	176	132	142	138	144	233	233	298	306	210	212	170	178	197	203	229	229	197	197	111	121	115	129
MKA10	166	176	132	142	138	144	233	233	298	306	210	212	170	178	197	203	229	229	0	0	111	121	115	129
MKA10	166	176	132	142	138	144	233	233	298	306	210	212	170	178	197	203	229	229	197	197	0	0	115	129
MKA10_Cons	166	176	132	142	138	144	233	233	298	306	210	212	170	178	197	203	229	229	197	197	111	121	115	129
MKA11B	0	0	132	142	140	140	217	233	298	312	210	210	170	178	203	203	225	229	0	0	111	111	115	131
MKA11B	0	0	132	142	140	140	217	233	298	312	210	210	170	178	203	203	225	229	197	197	111	111	115	131
MKA11B	0	0	132	142	140	140	217	233	298	312	210	210	170	178	203	203	225	229	197	197	111	111	115	131
MKA11B_Cons	0	0	132	142	140	140	217	233	298	312	210	210	170	178	203	203	225	229	197	197	111	111	115	131
MKA12	166	172	132	132	0	0	229	233	0	0	210	210	170	180	197	199	229	229	0	0	111	111	129	129
MKA12	166	172	132	132	0	0	229	233	298	298	208	210	170	180	199	199	229	229	0	0	111	121	115	129
MKA12	166	172	132	132	0	0	229	233	0	0	210	210	170	180	197	197	229	229	0	0	111	121	115	115
MKA12_Cons	166	172	132	132	0	0	229	233	0	0	208	210	170	180	197	199	229	229	0	0	111	121	115	129
MKA13B	172	174	128	132	136	138	217	233	290	290	210	212	170	178	203	203	225	229	184	197	111	111	129	129
MKA13B	172	174	128	132	136	138	217	233	290	290	210	212	170	178	203	203	0	0	0	0	111	111	129	129
MKA13B	172	174	128	132	136	138	217	233	290	290	210	212	170	178	203	203	225	229	0	0	111	111	129	129
MKA13B	172	174	128	132	136	138	217	233	290	290	210	212	170	178	203	203	0	0	184	197	0	0	129	129
MKA13B_Cons	172	174	128	132	136	138	217	233	290	290	210	212	170	178	203	203	225	229	184	197	111	111	129	129
MKA14	164	164	0	0	138	140	219	233	290	298	210	210	170	170	203	203	225	229	0	0	111	123	115	127
MKA14	164	164	132	142	138	140	219	233	290	298	210	210	170	170	0	0	225	229	184	197	111	123	115	127
MKA14	164	164	0	0	138	140	219	233	290	298	210	210	170	170	0	0	225	229	184	197	111	123	115	127
MKA14	164	164	132	142	138	140	219	233	290	298	210	210	170	170	203	203	225	229	0	0	111	123	115	127
MKA14_Cons	164	164	132	142	138	140	219	233	290	298	210	210	170	170	203	203	225	229	184	197	111	123	115	127
WED073B	172	172	128	132	0	0	233	233	290	298	210	210	170	178	197	203	229	229	197	197	121	123	129	129
WED073B	172	172	0	0	140	140	0	0	290	298	0	0	170	178	197	203	229	229	197	197	121	123	0	0
WED073B	172	172	128	132	0	0	0	0	0	0	0	0	0	0	197	203	229	229	0	0	0	0	0	0
WED073B	172	172	0	0	140	140	233	233	290	298	210	210	170	178	197	203	229	229	197	197	121	123	129	129
WED073B_Cons	172	172	128	132	0	0	0	0	290	298	0	0	170	178	197	203	229	229	197	197	121	123	0	0
WED075	172	176	128	132	136	144	217	233	284	306	210	210	178	178	197	203	229	229	197	197	111	121	129	129
WED075	172	176	128	132	136	144	217	233	284	306	210	210	178	178	197	203	229	229	197	197	111	121	129	129
WED075	172	176	128	132	136	144	217	233	284	306	210	210	178	178	197	203	229	229	197	197	111	121	129	129
WED075_Cons	172	176	128	132	136	144	217	233	284	306	210	210	178	178	197	203	229	229	197	197	111	121	129	129
WED077	178	178	132	132	140	142	217	217	290	306	210	210	0	0	203	203	229	229	197	197	111	123	115	115
WED077	178	178	132	132	140	142	217	217	290	306	210	210	178	180	203	203	229	229	197	197	111	123	115	115
WED077	178	178	132	132	140	142	217	217	290	306	210	210	178	180	203	203	229	229	197	197	111	123	115	115
WED077_Cons	178	178	132	132	140	142	217	217	290	306	210	210	178	180	203	203	229	229	197	197	111	123	115	115
WED077D	178	180	132	132	138	140	217	233	306	306	210	210	170	170	197	203	229	229	197	197	111	111	115	115
WED077D	178	180	132	132	138	138	217	233	306	306	210	210	170	170	197	203	229	229	197	197	111	111	115	115
WED077D	178	180	132	132	138	140	217	233	306	306	210	210	170	170	197	203	229	229	197	197	111	111	115	115
WED077D_Cons	178	180	132	132	138	140	217	233	306	306	210	210	170	170	197	203	229	229	197	197	111	111	115	115
WED078	166	178	132	132	136	144	217	229	298	306	210	210	170	178	197	197	229	229	197	197	111	111	115	129
WED078	166	178	132	132	136	144	217	229	298	306	0	0	170	178	0	0	229	229	184	197	111	111	115	129
WED078	166	178	132	132	136	144	217	229	298	306	210	210	170	178	197	197	229	229	197	197	111	111	115	129
WED078	166	178	132	132	0	0	217	229	298	306	210	210	170	170	197	197	229	229	197	197	0	0	0	0
WED078_Cons	166	178	132	132	136	144	217	229	298	306	210	210	170	178	197	197	229	229	197	197	111	111	115	129
WED079B	174	174	132	132	136	144	217	229	290	306	210	210	170	178	199	203	225	229	197	197	111	123	129	129
WED079B	174	174	132	132	136	144	217	229	290	306	210	210	170	178	199	203	225	229	197	197	111	123	129	129
WED079B	174	174	132	132	136	144	217	229	290	306	210	210	170	178	199	203	225	229	197	197	111	123	129	129
WED079B_Cons	174	174	132	132	136	144	217	229	290	306	210	210	170	178	199	203	225	229	197	197	111	123	129	129
WED079	174	174	132	132	136	144	217	229	290	306	210	210	170	178	199	203	225	229	197	197	111	123	129	129
WED079	174	174	132	132	136	144	217	229	290	306	210	210	170	178	199	203	225	229	0	0	111	123	0	0
WED079	174	174	132	132	136	144	217	229	290	306	210	210	170	178	199	203	225	229	0	0	111	123	129	129
WED079	174	174	132	132	136	144	217	229	0	0	210	210	170	178	199	203	225	229	0	0	111	123	129	129
WED079_Cons	174	174	132	132	136	144	217	229	290	306	210	210	170	178	199	203	225	229	0	0	111	123	129	129
WED080B	164	172	128	130	140	140	219	233	272	312	210	212	170	178	197	203	229	229	197	197	111	111	115	131
WED080B	164	172	128	130	140	140	219	233	272	312	210	212	170	178	197	203	229	229	197	197	111	111	115	131
WED080B	164	172	128	130	140	140	219	233	272	312	210	212	170	178	197	203	229	229	197	197	111	111	115	131
WED080B_Cons	164	172	128	130	140	140	219	233	272	312	210	212	170	178	197	203	229	229	197	197	111	111	115	131
WED080	164	172	128	130	140	140	219	233	272	312	210	212	170	178	197	203	229	229	197	197	111	111	115	131
WED080	164	172	128	130	140	140	219	233	272	312	210	212	170	178	197	203	229	229	0	0	111	111	115	131
WED080	164	172	128	130	140	140	219	233	272	312	210	212	170	178	197	203	229	229	197	197	111	111	115	131
WED080	164	172	128	130	140	140	219	233	272	312	210	212	170	178	197	203	229	231	197	197	111	111	115	131
WED080_Cons	164	172	128	130	140	140	219	233	272	312	210	212	170	178	197	203	229	229	197	197	111	111	115	131
WED082B	164	176	128	132	140	144	217	229	284	290	210	210	170	180	197	199	225	229	184	197	111	121	127	129
WED082B	164	176	128	132	140	144	217	229	284	290	210	210	170	180	197	199	225	229	184	197	111	121	127	129
WED082B	164	176	128	132	140	144	217	229	284	290	210	210	170	180	197	199	225	229	184	197	111	121	127	129
WED082B_Cons	164	176	128	132	140	144	217	229	284	290	210	210	170	180	197	199	225	229	184	197	111	121	127	129
WED082	164	176	128	132	140	144	217	229	284	290	210	210	170	180	197	199	225	229	184	197	111	121	127	129
WED082	164	176	128	132	140	144	217	229	284	290	210	210	170	180	197	199	225	229	0	0	111	121	127	129
WED082	164	176	128	132	140	144	217	229	284	290	210	210	170	180	197	199	225	229	184	197	0	0	127	129
WED082	164	176	128	132	140	144	217	229	0	0	210	210	0	0	197	199	225	229	184	197	111	121	127	129
WED082_Cons	164	176	128	132	140	144	217	229	284	290	210	210	170	180	197	199	225	229	184	197	111	121	127	129
WED083	178	180	132	132	138	140	217	233	306	306	210	210	170	170	197	203	229	229	197	197	111	111	115	115
WED083	178	180	132	132	0	0	217	233	306	306	210	210	170	170	197	203	229	229	197	197	111	111	115	115
WED083	178	180	132	132	138	140	217	233	306	306	210	210	170	170	197	203	229	229	197	197	111	111	115	115
WED083	178	180	132	132	138	140	217	233	306	306	210	210	170	170	197	203	229	229	197	197	111	111	115	115
WED083_Cons	178	180	132	132	138	140	217	233	306	306	210	210	170	170	197	203	229	229	197	197	111	111	115	115
WED084B	0	0	128	132	0	0	217	233	284	290	210	210	170	180	199	203	225	229	0	0	121	123	129	129
WED084B	172	176	128	132	0	0	217	233	284	290	210	210	170	180	199	203	225	229	0	0	121	123	129	129
WED084B	172	176	128	132	0	0	217	233	284	290	210	210	170	180	199	203	225	229	0	0	121	123	129	129
WED084B_Cons	172	176	128	132	0	0	217	233	284	290	210	210	170	180	199	203	225	229	0	0	121	123	129	129
WED084	172	176	128	132	0	0	217	233	284	290	210	210	170	170	199	203	225	229	0	0	121	123	129	129
WED084	172	176	128	132	0	0	233	233	284	284	210	210	170	180	0	0	225	229	0	0	121	123	129	129
WED084	172	176	128	132	0	0	217	233	284	290	210	210	170	180	199	203	225	229	0	0	121	123	129	129
WED084	0	0	128	132	0	0	217	233	0	0	210	210	170	180	199	203	225	225	0	0	121	123	129	129
WED084_Cons	172	176	128	132	0	0	217	233	284	290	210	210	170	180	199	203	225	229	0	0	121	123	129	129
WED085	172	176	128	128	140	144	217	229	284	290	210	210	170	178	197	199	225	229	184	197	121	123	127	129
WED085	172	176	128	128	140	144	217	229	284	290	210	210	170	178	197	199	225	229	184	197	121	123	127	129
WED085	172	176	128	128	140	144	217	229	284	290	210	210	170	178	197	199	225	229	184	197	121	123	127	129
WED085_Cons	172	176	128	128	140	144	217	229	284	290	210	210	170	178	197	199	225	229	184	197	121	123	127	129
WED087	164	178	128	142	138	140	217	233	290	298	210	210	170	180	203	203	229	229	197	197	111	111	115	131
WED087	164	178	128	142	138	140	217	233	290	298	210	210	170	180	203	203	229	229	197	197	111	111	115	131
WED087	164	178	128	142	138	140	217	233	290	298	210	210	170	180	203	203	229	229	197	197	111	111	115	131
WED087_Cons	164	178	128	142	138	140	217	233	290	298	210	210	170	180	203	203	229	229	197	197	111	111	115	131
WED088	166	180	128	132	136	138	217	233	290	306	210	212	170	178	197	203	229	229	197	197	111	111	115	131
WED088	166	180	128	132	136	138	217	233	290	306	210	212	170	178	197	203	229	229	0	0	0	0	115	131
WED088	166	180	128	132	136	138	217	233	290	306	210	212	170	178	197	203	229	229	197	197	111	111	115	131
WED088	166	180	0	0	0	0	217	233	290	306	210	212	0	0	197	203	0	0	197	197	111	111	115	131
WED088_Cons	166	180	128	132	136	138	217	233	290	306	210	212	170	178	197	203	229	229	197	197	111	111	115	131
WED088E	172	174	132	132	0	0	217	233	298	306	210	210	170	178	197	197	229	229	197	197	111	123	117	129
WED088E	172	174	132	132	136	140	217	233	298	306	210	210	170	178	197	197	229	229	0	0	111	123	115	129
WED088E	0	0	132	132	136	140	217	233	298	306	210	210	170	178	197	197	229	229	197	197	111	123	115	129
WED088E	172	174	132	132	0	0	217	233	298	306	210	210	170	178	197	197	229	229	197	197	111	123	129	129
WED088E_Cons	172	174	132	132	136	140	217	233	298	306	210	210	170	178	197	197	229	229	197	197	111	123	115	129
WED089B	166	180	128	132	136	138	217	233	290	306	210	212	170	178	197	203	229	229	197	197	111	111	115	131
WED089B	166	180	128	132	136	138	217	233	290	306	210	212	170	178	197	203	229	229	197	197	111	111	115	131
WED089B	166	180	128	132	136	138	217	233	290	306	210	212	170	178	197	203	229	229	197	197	111	111	115	131
WED089B_Cons	166	180	128	132	136	138	217	233	290	306	210	212	170	178	197	203	229	229	197	197	111	111	115	131
WED089	166	180	128	132	136	138	217	233	290	306	210	212	170	178	197	203	229	229	197	197	111	111	115	131
WED089	166	180	0	0	136	138	217	217	0	0	210	212	170	178	197	203	229	229	197	197	111	111	0	0
WED089	166	180	128	132	136	138	217	233	290	306	210	212	170	178	197	203	229	229	197	197	111	111	115	131
WED089	166	180	128	132	0	0	217	233	290	306	210	212	0	0	197	203	229	229	197	197	111	111	115	131
WED089_Cons	166	180	128	132	136	138	217	233	290	306	210	212	170	178	197	203	229	229	197	197	111	111	115	131
WED081E	172	176	142	142	0	0	229	233	290	298	210	212	170	178	199	203	229	229	197	197	111	111	127	129
WED081E	172	176	142	142	0	0	229	233	290	298	210	212	170	178	199	199	229	229	197	197	111	111	127	129
WED081E	172	176	142	142	0	0	229	233	290	298	210	212	170	178	199	203	229	229	197	197	111	111	127	129
WED081E_Cons	172	176	142	142	0	0	229	233	290	298	210	212	170	178	199	203	229	229	197	197	111	111	127	129
WED128B	172	176	128	128	0	0	217	229	284	290	210	210	170	178	197	199	225	229	184	197	121	123	127	129
WED128B	172	176	128	128	0	0	217	229	284	290	210	210	170	178	197	199	225	229	184	197	121	123	127	129
WED128B	172	176	128	128	0	0	217	229	284	290	210	210	170	178	197	199	225	229	184	197	121	123	127	129
WED128B_Cons	172	176	128	128	0	0	217	229	284	290	210	210	170	178	197	199	225	229	184	197	121	123	127	129
WED130A	166	166	128	132	138	140	217	233	290	298	210	210	0	0	197	203	229	229	197	197	111	111	115	129
WED130A	166	166	128	132	138	140	217	233	290	298	210	210	178	178	197	203	229	229	197	197	111	111	115	129
WED130A	166	166	128	132	138	140	217	233	290	298	210	210	178	178	197	203	229	229	197	197	111	111	115	129
WED130A_Cons	166	166	128	132	138	140	217	233	290	298	210	210	178	178	197	203	229	229	197	197	111	111	115	129
WED076D	174	178	132	132	0	0	217	233	284	306	210	210	178	178	197	203	229	229	0	0	111	111	129	129
WED076D	174	178	132	132	136	136	217	233	284	306	210	210	178	178	197	203	229	229	197	197	111	111	129	129
WED076D	0	0	132	132	136	136	217	233	284	306	210	210	178	178	197	203	229	229	197	197	111	111	129	129
WED076D	174	178	132	132	136	136	217	233	284	306	210	210	178	178	197	203	229	229	0	0	111	111	129	129
WED076D_Cons	174	178	132	132	136	136	217	233	284	306	210	210	178	178	197	203	229	229	0	0	111	111	129	129
WED131B	164	164	128	142	138	138	233	233	290	290	210	210	170	178	199	203	225	229	197	197	111	111	115	127
WED131B	164	164	128	142	138	138	233	233	290	290	210	210	170	178	199	203	225	229	197	197	111	111	115	127
WED131B	164	164	128	142	138	138	233	233	290	290	210	210	170	178	199	203	225	229	197	197	111	111	115	127
WED131B_Cons	164	164	128	142	138	138	233	233	290	290	210	210	170	178	199	203	225	229	197	197	111	111	115	127

## Sheet: Genotypes
Sample ID	DNA concentration (ng/µL)	Ind	Koala name	Sampling date	Gender	K2.1	K2.1	K10.1	K10.1	Pcv2	Pcv2	Pcv6.1	Pcv6.1	Pcv6.3	Pcv6.3	Pcv24.2	Pcv24.2	Pcv25.2	Pcv25.2	Pcv30	Pcv30	Pcv31	Pcv31	Phc2	Phc2	Phc4	Phc4	Phc13	Phc13	Positive loci
KCC_01_MKA10	7.9	1	Merriki	2007	F	166	176	132	142	138	144	233	233	298	306	210	212	170	178	197	203	229	229	197	197	111	121	115	129	12
KCC_02_MKA12	2.1	2	Merv	2007	M	166	172	132	132	0	0	229	233	0	0	208	210	170	180	197	199	229	229	0	0	111	121	115	129	9
KCC_03_A_WED074	28.2	3	Molly	2013-05-01	F	166	178	128	142	136	138	217	233	290	306	210	212	178	178	199	203	229	229	197	197	111	111	129	131	12
KCC_03_MKA04	4.84	3	Molly	2007	F	166	178	128	142	136	138	217	233	290	306	210	212	178	178	199	203	229	229	0	0	111	111	129	131	11
KCC_04_WED081E	2.52	4	Emma	2013-11-01	F	172	176	142	142	0	0	229	233	290	298	210	212	170	178	199	203	229	229	197	197	111	111	127	129	11
KCC_05_B_WED089B	1.28	5	Mitta	2013-05-01	M	166	180	128	132	136	138	217	233	290	306	210	212	170	178	197	203	229	229	197	197	111	111	115	131	12
KCC_05_WED088	0.624	5	Mitta	2013-05-01	M	166	180	128	132	136	138	217	233	290	306	210	212	170	178	197	203	229	229	197	197	111	111	115	131	12
KCC_05_WED089	0.36	5	Mitta	2013-05-01	M	166	180	128	132	136	138	217	233	290	306	210	212	170	178	197	203	229	229	197	197	111	111	115	131	12
KCC_06_MKA05	0.488	6	Marlo	2007	M	0	0	0	0	138	140	217	233	290	298	210	210	178	178	0	0	0	0	0	0	111	111	115	129	7
KCC_06_WED130A	22.8	6	Marlo	2013-11-01	M	166	166	128	132	138	140	217	233	290	298	210	210	178	178	197	203	229	229	197	197	111	111	115	129	12
KCC_07B_MKA03B	0.2	7	Mantis	2007	M	166	172	128	142	138	140	233	233	290	290	210	212	0	0	203	203	225	229	0	0	111	123	129	131	10
KCC_08_WED132A	0.822	8	Mac	2013-11-01	M	166	180	132	142	138	140	217	233	290	306	210	210	170	178	197	203	229	229	197	197	111	111	115	131	12
KCC_09_MKA02	0.3	9	Marrguk	2007	F	0	0	128	142	0	0	233	233	0	0	210	212	0	0	0	0	0	0	0	0	111	123	129	131	6
KCC_10_WED077	8.22	10	Lorien	2013-05-01	F	178	178	132	132	140	142	217	217	290	306	210	210	178	180	203	203	229	229	197	197	111	123	115	115	12
KCC_11_MKA13B	0.128	11	Lindsay	2007	M	172	174	128	132	136	138	217	233	290	290	210	212	170	178	203	203	225	229	184	197	111	111	129	129	12
KCC_12_MKA09	3.94	12	Nellie	2007	F	176	178	132	132	140	142	217	217	290	290	210	210	170	170	197	199	225	229	197	197	123	123	129	129	12
KCC_13_MKA11B	1.53	13	Kevin	2007	M	0	0	132	142	140	140	217	233	298	312	210	210	170	178	203	203	225	229	197	197	111	111	115	131	11
KCC_14_MKA08	1.364	14	Nugget	2007	F	0	0	128	132	140	142	229	229	290	298	210	210	170	178	199	203	225	229	0	0	111	123	129	129	11
KCC_15_WED129A	11.8	15	Nemo	2013-11-01	F	166	172	128	132	140	140	229	233	290	290	210	210	178	178	203	203	229	229	197	197	123	123	115	129	12
KCC_16_WED073B	0.19	16	Nautilus	2013-05-01	M	172	172	128	132	0	0	0	0	290	298	0	0	170	178	197	203	229	229	197	197	121	123	0	0	8
KCC_17_WED075	6.72	17	Cassie	2013-05-01	F	172	176	128	132	136	144	217	233	284	306	210	210	178	178	197	203	229	229	197	197	111	121	129	129	12
KCC_18_WED085	1.028	18	Lisa	2013-05-01	F	172	176	128	128	140	144	217	229	284	290	210	210	170	178	197	199	225	229	184	197	121	123	127	129	12
KCC_18_WED128B	16.2	18	Lisa	2013-11-01	F	172	176	128	128	0	0	217	229	284	290	210	210	170	178	197	199	225	229	184	197	121	123	127	129	11
KCC_19_A_WED082B	3.8	19	Lara	2013-05-01	F	164	176	128	132	140	144	217	229	284	290	210	210	170	180	197	199	225	229	184	197	111	121	127	129	12
KCC_19_WED082	4.9	19	Lara	2013-05-01	F	164	176	128	132	140	144	217	229	284	290	210	210	170	180	197	199	225	229	184	197	111	121	127	129	12
KCC_20_A_WED084B	1.08	20	Lennox	2013-05-01	F	172	176	128	132	0	0	217	233	284	290	210	210	170	180	199	203	225	229	0	0	121	123	129	129	10
KCC_20_WED084	0.462	20	Lennox	2013-05-01	F	172	176	128	132	0	0	217	233	284	290	210	210	170	180	199	203	225	229	0	0	121	123	129	129	10
KCC_21_WED076D	0.426	21	Harriett	2013-11-01	F	174	178	132	132	136	136	217	233	284	306	210	210	178	178	197	203	229	229	197	197	111	111	129	129	12
KCC_22_WED088E	0.674	22	Howqua	2013-11-01	F	172	174	132	132	136	140	217	233	298	306	210	210	170	178	197	197	229	229	197	197	111	123	115	129	12
KCC_23_WED078	0.804	23	Hara	2013-05-01	F	166	178	132	132	136	144	217	229	298	306	210	210	170	178	197	197	229	229	197	197	111	111	115	129	12
KCC_24_A_WED079B	1.16	24	Han	2013-05-01	F	174	174	132	132	136	144	217	229	290	306	210	210	170	178	199	203	225	229	197	197	111	123	129	129	12
KCC_24_WED079	0.506	24	Han	2013-05-01	F	174	174	132	132	136	144	217	229	290	306	210	210	170	178	199	203	225	229	0	0	111	123	129	129	11
KCC_25_MKA14	0.484	25	Jupiter	2007	F	164	164	132	142	138	140	219	233	290	298	210	210	170	170	203	203	225	229	184	197	111	123	115	127	12
KCC_26_MKA01	0.466	26	Ganymede	2007	M	164	172	128	142	138	140	229	233	290	290	210	210	0	0	199	203	225	229	0	0	111	123	127	131	10
KCC_27_WED087	1.138	27	Callisto	2013-05-01	F	164	178	128	142	138	140	217	233	290	298	210	210	170	180	203	203	229	229	197	197	111	111	115	131	12
KCC_28_WED131B	35.2	28	Crimson	2013-11-01	F	164	164	128	142	138	138	233	233	290	290	210	210	170	178	199	203	225	229	197	197	111	111	115	127	12
KCC_29_MKA06	1.124	29	Banjo	2007	M	164	166	132	132	140	140	217	233	290	298	210	210	0	0	197	203	229	231	0	0	111	123	115	129	11
KCC_30_WED077D	2.08	30	Vivian	2013-11-01	M	178	180	132	132	138	140	217	233	306	306	210	210	170	170	197	203	229	229	197	197	111	111	115	115	12
KCC_30_WED083	0.414	30	Vivian	2013-05-01	M	178	180	132	132	138	140	217	233	306	306	210	210	170	170	197	203	229	229	197	197	111	111	115	115	12
KCC_31_A_WED080B	2.08	31	Bernie	2013-05-01	F	164	172	128	130	140	140	219	233	272	312	210	212	170	178	197	203	229	229	197	197	111	111	115	131	12
KCC_31_WED080	0.666	31	Bernie	2013-05-01	F	164	172	128	130	140	140	219	233	272	312	210	212	170	178	197	203	229	229	197	197	111	111	115	131	12
KCC_32_WED025	1.2	32	Hawkins	2013-05-01	M	164	172	130	132	142	142	217	217	298	306	210	212	170	178	197	199	225	229	184	197	111	113	115	115	12

## Sheet: Parentage
	Koala name	Gender	K2.1	K2.1	K10.1	K10.1	Pcv2	Pcv2	Pcv6.1	Pcv6.1	Pcv6.3	Pcv6.3	Pcv24.2	Pcv24.2	Pcv25.2	Pcv25.2	Pcv30	Pcv30	Pcv31	Pcv31	Phc2	Phc2	Phc4	Phc4	Phc13	Phc13
	Mother	F	A	B			A	B
	Offspring (approx birth year)		A	D			A	E
	Father	M	C	D			C	D
	Grey text:									Compatible maternal alleles										Non-matching alleles
	Individuals without genotype data
										Compatible paternal alleles										Compatible alleles at all available loci
										Probable errors (allelic dropout or false alleles)
Merriki's family
1	Merriki	F	166	176	132	142	138	144	233	233	298	306	210	212	170	178	197	203	229	229	197	197	111	121	115	129
	Merriki	F	166	176	132	142	138	144	233	233	298	306	210	212	170	178	197	203	229	229	197	197	111	121	115	129
2	Merv (2004)	M	166	172	132	132	0	0	229	233	0	0	208	210	170	180	197	199	229	229	0	0	111	121	115	129
	Unknown	M
	Merriki	F	166	176	132	142	138	144	233	233	298	306	210	212	170	178	197	203	229	229	197	197	111	121	115	129
3	Molly (2001)	F	166	178	128	142	136	138	217	233	290	306	210	212	178	178	199	203	229	229	197	197	111	111	129	131
	Karlos?	M
	Merriki	F	166	176	132	142	138	144	233	233	298	306	210	212	170	178	197	203	229	229	197	197	111	121	115	129
4	Emma	F	172	176	142	142	0	0	229	233	290	298	210	212	170	178	199	203	229	229	197	197	111	111	127	129
	Ganymede	F	164	172	128	142	138	140	229	233	290	290	210	210	0	0	199	203	225	229	0	0	111	123	127	131
Molly's family
	Molly	F	166	178	128	142	136	138	217	233	290	306	210	212	178	178	199	203	229	229	197	197	111	111	129	131
5	Mitta (2010)	M	166	180	128	132	136	138	217	233	290	306	210	212	170	178	197	203	229	229	197	197	111	111	115	131
	Vivian	M	178	180	132	132	138	140	217	233	306	306	210	210	170	170	197	203	229	229	197	197	111	111	115	115
	Molly	F	166	178	128	142	136	138	217	233	290	306	210	212	178	178	199	203	229	229	197	197	111	111	129	131
6	Marlo (2004)	M	166	166	128	132	138	140	217	233	290	298	210	210	178	178	197	203	229	229	197	197	111	111	115	129
	Banjo	M	164	166	132	132	140	140	217	233	290	298	210	210	0	0	197	203	229	231	0	0	111	123	115	129
	Molly	F	166	178	128	142	136	138	217	233	290	306	210	212	178	178	199	203	229	229	197	197	111	111	129	131
7	Mantis (2005)	M	166	172	128	142	138	140	233	233	290	290	210	212	0	0	203	203	225	229	0	0	111	123	129	131
	Ganymede	M	164	172	128	142	138	140	229	233	290	290	210	210	0	0	199	203	225	229	0	0	111	123	127	131
	Molly	F	166	178	128	142	136	138	217	233	290	306	210	212	178	178	199	203	229	229	197	197	111	111	129	131
8	Mac (2008)	M	166	180	132	142	138	140	217	233	290	306	210	210	170	178	197	203	229	229	197	197	111	111	115	131
	Vivian	M	178	180	132	132	138	140	217	233	306	306	210	210	170	170	197	203	229	229	197	197	111	111	115	115
	Molly	F	166	178	128	142	136	138	217	233	290	306	210	212	178	178	199	203	229	229	197	197	111	111	129	131
9	Marrguk (2004)	F	0	0	128	142	0	0	233	233	0	0	210	212	0	0	0	0	0	0	0	0	111	123	129	131
	Ganymede	M	164	172	128	142	138	140	229	233	290	290	210	210	0	0	199	203	225	229	0	0	111	123	127	131
	Marrguk	F	0	0	128	142	138	140	233	233	0	0	210	212	0	0	0	0	0	0	0	0	111	123	129	131
10	Lorien (2008)	F	178	178	132	132	140	142	217	217	290	306	210	210	178	180	203	203	229	229	197	197	111	123	115	115
	Unknown	M
Sample does not match with known Marrguk as mother - Lorien sample does not match as offspring of any of the individuals genotyped
	Marrguk	F	0	0	128	142	138	140	233	233	290	290	210	212	0	0	203	203	225	225	0	0	111	123	129	131
11	Lindsay (2005)	M	172	174	128	132	136	138	217	233	290	290	210	212	170	178	203	203	225	229	184	197	111	111	129	129
	Unknown	M
Nellie's family
12	Nellie (PI:1996)	F	176	178	132	132	140	142	217	217	290	290	210	210	170	170	197	199	225	229	197	197	123	123	129	129
	Nellie (PI:1996)	F	176	178	132	132	140	142	217	217	290	290	210	210	170	170	197	199	225	229	197	197	123	123	129	129
13	Kevin	M	0	0	132	142	140	140	217	233	298	312	210	210	170	178	203	203	225	229	197	197	111	111	115	131
	Unknown
Kevin's genotype is incompatible with that of his presumed mother, Nellie
	Nellie (PI:1996)	F	176	178	132	132	140	142	217	217	290	290	210	210	170	170	197	199	225	229	197	197	123	123	129	129
	Natasha	F
	Unknown	M
	Natasha	F
14	Nugget	F	0	0	128	132	140	142	229	229	290	298	210	210	170	178	199	203	225	229	0	0	111	123	129	129
	Unknown	M
	Nugget	F	0	0	128	132	140	142	229	229	290	298	210	210	170	178	199	203	225	229	0	0	111	123	129	129
15	Nemo	F	166	172	128	132	140	140	229	233	290	290	210	210	178	178	203	203	229	229	197	197	123	123	115	129
	Unknown	M
	Nugget	F	0	0	128	132	140	142	229	229	290	298	210	210	170	178	199	203	225	229	0	0	111	123	129	129
15	Nemo	F	166	172	128	132	140	140	229	233	290	290	210	210	178	178	203	203	229	229	197	197	123	123	115	129
	Banjo	M	164	166	132	132	140	140	217	233	290	298	210	210	0	0	197	203	229	231	0	0	111	123	115	129
Banjo has a genotype that is compatible with Nemo - Banjo is a potential father of Nemo
	Nemo	F	166	172	128	132	140	140	229	233	290	290	210	210	178	178	203	203	229	229	197	197	123	123	115	129
16	Nautilus (2007)	M	172	172	128	132	0	0	0	0	290	298	0	0	170	178	197	203	229	229	197	197	121	123	0	0
	Merv	M	166	172	132	132	0	0	229	233	0	0	208	210	170	180	197	199	229	229	0	0	111	121	115	129
Cassie's family
17	Cassie	F	172	176	128	132	136	144	217	233	284	306	210	210	178	178	197	203	229	229	197	197	111	121	129	129
	Cassie	F	172	176	128	132	136	144	217	233	284	306	210	210	178	178	197	203	229	229	197	197	111	121	129	129
18	Lisa (2002)	F	172	176	128	128	140	144	217	229	284	290	210	210	170	178	197	199	225	229	184	197	121	123	127	129
	Banjo	M	164	166	132	132	140	140	217	233	290	298	210	210	0	0	197	203	229	231	0	0	111	123	115	129
Banjo's genotype is incompatible with Lisa
	Cassie	F	172	176	128	132	136	144	217	233	284	306	210	210	178	178	197	203	229	229	197	197	111	121	129	129
18	Lisa (2002)	F	172	176	128	128	140	144	217	229	284	290	210	210	170	178	197	199	225	229	184	197	121	123	127	129
	Ganymede	M	164	172	128	142	138	140	229	233	290	290	210	210	0	0	199	203	225	229	0	0	111	123	127	131
Ganymede is a potential father of Lisa
	Lisa	F	172	176	128	128	140	144	217	229	284	290	210	210	170	178	197	199	225	229	184	197	121	123	127	129
19	Lara (2007)	F	164	176	128	132	140	144	217	229	284	290	210	210	170	180	197	199	225	229	184	197	111	121	127	129
	Merv	M	166	172	132	132	0	0	229	233	0	0	208	210	170	180	197	199	229	229	0	0	111	121	115	129
Incompatible allele sizes at 1 locus for Merv being Lara's father
	Lisa	F	172	176	128	128	140	144	217	229	284	290	210	210	170	178	197	199	225	229	184	197	121	123	127	129
19	Lara (2007)	F	164	176	128	132	140	144	217	229	284	290	210	210	170	180	197	199	225	229	184	197	111	121	127	129
	Banjo	M	164	166	132	132	140	140	217	233	290	298	210	210	0	0	197	203	229	231	0	0	111	123	115	129
Banjo is a potential father of Lara
	Lara	F	164	176	128	132	140	144	217	229	284	290	210	210	170	180	197	199	225	229	184	197	111	121	127	129
20	Lennox (2011)	M	172	176	128	132	0	0	217	233	284	290	210	210	170	180	199	203	225	229	0	0	121	123	129	129
	Vivian	M	178	180	132	132	138	140	217	233	306	306	210	210	170	170	197	203	229	229	197	197	111	111	115	115
Mismatches at 4 loci for Vivian to be Lennox's father
	Lara	F	164	176	128	132	140	144	217	229	284	290	210	210	170	180	197	199	225	229	184	197	111	121	127	129
20	Lennox (2011)	M	172	176	128	132	0	0	217	233	284	290	210	210	170	180	199	203	225	229	0	0	121	123	129	129
	Nautilus	M	172	172	128	132	0	0	0	0	290	298	0	0	170	178	197	203	229	229	197	197	121	123	0	0
Nautilus is a potential father of Lennox
Harriet's family
21	Harriett	F	174	178	132	132	136	136	217	233	284	306	210	210	178	178	197	203	229	229	197	197	111	111	129	129
	Harriett	F	174	178	132	132	136	136	217	233	284	306	210	210	178	178	197	203	229	229	197	197	111	111	129	129
22	Howqua (2010)	F	172	174	132	132	136	140	217	233	298	306	210	210	170	178	197	197	229	229	197	197	111	123	115	129
	Nautilus	M	172	172	128	132	0	0	0	0	290	298	0	0	170	178	197	203	229	229	197	197	121	123	0	0
	Harriett	F	174	178	132	132	136	136	217	233	284	306	210	210	178	178	197	203	229	229	197	197	111	111	129	129
22	Howqua (2010)	F	172	174	132	132	136	140	217	233	298	306	210	210	170	178	197	197	229	229	197	197	111	123	115	129
		M
	Harriett	F	174	178	132	132	136	136	217	233	284	306	210	210	178	178	197	203	229	229	197	197	111	111	129	129
23	Hara (2009)	F	166	178	132	132	136	144	217	229	298	306	210	210	170	178	197	197	229	229	197	197	111	111	115	129
	Merv	M	166	172	132	132	0	0	229	233	0	0	208	210	170	180	197	199	229	229	0	0	111	121	115	129
	Harriett	F	174	178	132	132	136	136	217	233	284	306	210	210	178	178	197	203	229	229	197	197	111	111	129	129
24	Han (2008)	F	174	174	132	132	136	144	217	229	290	306	210	210	170	178	199	203	225	229	197	197	111	123	129	129
	Unknown	M
Jupiter's family
25	Jupiter	F	164	164	132	142	138	140	219	233	290	298	210	210	170	170	203	203	225	229	184	197	111	123	115	127
	Jupiter	F	164	164	132	142	138	140	219	233	290	298	210	210	170	170	203	203	225	229	184	197	111	123	115	127
26	Ganymede (2000)	M	164	172	128	142	138	140	229	233	290	290	210	210	170	0	199	203	225	229	0	0	111	123	127	131
	Karlos or Jack [?]	M
	Jupiter	F	164	164	132	142	138	140	219	233	290	298	210	210	170	170	203	203	225	229	184	197	111	123	115	127
27	Callisto (2001)	F	164	178	128	142	138	140	217	233	290	298	210	210	170	180	203	203	229	229	197	197	111	111	115	131
	Jack [?]	M
	Callisto	F	164	178	128	142	138	140	217	233	290	298	210	210	170	180	203	203	229	229	197	197	111	111	115	131
28	Crimson (2005)	F	164	164	128	142	138	138	233	233	290	290	210	210	170	178	199	203	225	229	197	197	111	111	115	127
	Ganymede	M	164	172	128	142	138	140	229	233	290	290	210	210	0	0	199	203	225	229	0	0	111	123	127	131
Individuals
29	Banjo	M	164	166	132	132	140	140	217	233	290	298	210	210	0	0	197	203	229	231	0	0	111	123	115	129
30	Vivian	M	178	180	132	132	138	140	217	233	306	306	210	210	170	170	197	203	229	229	197	197	111	111	115	115
31	Bernie	F	164	172	128	130	140	140	219	233	272	312	210	212	170	178	197	203	229	229	197	197	111	111	115	131
32	Hawkins	M	164	172	130	132	142	142	217	217	298	306	210	212	170	178	197	199	225	229	184	197	111	113	115	115

## Sheet: Summary
Summary of koala relationships supported by genotypic data
Ref#	Year sampled	Offspring (No. loci amplified)	Gender		Pedigree records		Relationship confirmed from genotypes
			Known	XY PCR	Mother (No. loci amplified)	Father (No. loci amplified)	Mother	Father	Compatible genotypes (potential relationships) & comments
1	2007	Merriki (12/12)	Female	ü			-
2	2007	Merv (9/12)	Male	ü	Merriki (12/12)		ü
3	2013	Molly (12/12)	Female	ü	Merriki (12/12)		ü
4	2013	Emma (11/12)	Female	ü	Merriki (12/12)	Ganymede (10/12)	ü	ü
5	2013	Mitta (12/12)	Male	ü	Molly (12/12)	Vivian (12/12)	ü	ü
6	2007	Marlo (8/12)	Male	ü	Molly (12/12)	Banjo (10/12)	ü	ü
6	2013	Marlo (12/12)	Male	ü	Molly (12/12)	Banjo (10/12)	ü	ü
7	2007	Mantis - B (10/12)	Male	ü	Molly (12/12)	Ganymede (10/12)	ü	ü
8	2013	Mac (12/12)	Male	ü	Molly (12/12)	Vivian (12/12)	ü	ü
9	2007	Marrguk (6/12)	Female	ü	Molly (12/12)	Ganymede (10/12)	ü	ü
10	2013	Lorien (12/12)	Female	ü	Marrguk (6/12)		û		3 mismatched loci between Marrguk and Lorien.
11	2007	Lindsay (12/12)	Male	fail	Marrguk (6/12)		ü		Y PCR failed - faint X. Low DNA cocentration (0.128 ng/µL)
12	2007	Nellie (12/12)	Female	ü
13	2007	Kevin (11/12)	Male	fail	Nellie (12/12)		û		Compatible genotypes with Marlo, Banjo, Callisto and Jupiter (individually) but no compatibility found with a parent pair
14	2007	Nugget (10/12)	Female	ü	Natasha				Natasha not sampled
15	2013	Nemo (12/12)	Female	ü	Nugget (10/12)		ü		Potential father - Banjo
16	2013	Nautilus (8/12)	Male	ü	Nemo (12/12)	Merv (9/12)	ü	ü
17	2013	Cassie (12/12)	Female	ü
18	2013	Lisa (12/12)	Female	ü	Cassie (12/12)	Banjo (9/12)	ü	û	Potential father - Ganymede
19	2013	Lara (12/12)	Female	ü	Lisa (12/12)	Merv (9/12)	ü	û	Potential father - Banjo
20	2013	Lennox (10/12)	Male	ü	Lara (12/12)	Vivian (12/12)	ü	û	Potential father - Nautilus, Potential father - Mantis
21	2013	Harriet (12/12)	Female	ü
22	2013	Howqua (12/12)	Female	ü	Harriett (12/12)	Nautilus (8/12)	ü	ü
23	2013	Hara (12/12)	Female	ü	Harriett (12/12)	Merv (9/12)	ü	ü
24	2013	Han (11/12)	Female	ü	Harriett (12/12)		ü
25	2007	Jupiter (12/12)	Female	ü
26	2007	Ganymede (10/12)	Male	ü	Jupiter (12/12)		ü
27	2013	Callisto (12/12)	Female	ü	Jupiter (12/12)		ü
28	2013	Crimson (12/12)	Female	ü	Callisto (12/12)	Ganymede (10/12)	ü	ü
29	2007	Banjo (10/12)	Male	ü
30	2013	Vivian (12/12)	Male	ü
31	2013	Bernie (12/12)	Female	ü
32	2013	Hawkins (12/12)	Male	ü
